# Supplementary material for: Ab initio calculation of electronic charge mobility in metal–organic frameworks
Source: Royal Society of Chemistry journal article supplement (doi:10.1039/c5cp03920g), 2015-01-01
Supplement: c5cp03920g1.pdf [file c5cp03920g1.pdf]

Supplemental Information:

| Strain  | Total Energy (eV) |                     |                     |
|---------|-------------------|---------------------|---------------------|
|         | BDC               | BDC+NH <sub>2</sub> | BDC+NO <sub>2</sub> |
| -0.0150 | -161.5837         | -170.8760           | -197.8465           |
| -0.0125 | -161.5927         | -170.8851           | -197.8558           |
| -0.0100 | -161.6003         | -170.8926           | -197.8637           |
| -0.0075 | -161.6066         | -170.8989           | -197.8701           |
| -0.0050 | -161.6112         | -170.9034           | -197.8749           |
| -0.0025 | -161.6142         | -170.9064           | -197.8780           |
| 0.0000  | -161.6152         | -170.9073           | -197.8790           |
| 0.0025  | -161.6142         | -170.9062           | -197.8780           |
| 0.0050  | -161.6109         | -170.9028           | -197.8746           |
| 0.0075  | -161.6050         | -170.8971           | -197.8685           |
| 0.0100  | -161.5965         | -170.8884           | -197.8597           |
| 0.0125  | -161.5850         | -170.8770           | -197.8479           |
| 0.0150  | -161.5702         | -170.8623           | -197.8326           |

Table 1: Total energy for thirteen strain calculation ranging from -1.5% to +1.5% for a PBE functional. Note, these energies reported are pseudopotential dependent.

| Strain  | LUMO (eV) |                     |                     | HOMO (eV) |                     |                     |
|---------|-----------|---------------------|---------------------|-----------|---------------------|---------------------|
|         | BDC       | BDC+NH <sub>2</sub> | BDC+NO <sub>2</sub> | BDC       | BDC+NH <sub>2</sub> | BDC+NO <sub>2</sub> |
| -0.0150 | 1.360     | 1.850               | 1.730               | -1.630    | -0.110              | -1.020              |
| -0.0125 | 1.310     | 1.800               | 1.670               | -1.670    | -0.150              | -1.060              |
| -0.0100 | 1.260     | 1.740               | 1.620               | -1.710    | -0.190              | -1.050              |
| -0.0075 | 1.220     | 1.690               | 1.570               | -1.750    | -0.230              | -1.150              |
| -0.0050 | 1.170     | 1.640               | 1.510               | -1.790    | -0.270              | -1.200              |
| -0.0025 | 1.120     | 1.590               | 1.460               | -1.830    | -0.310              | -1.230              |
| 0.0000  | 1.070     | 1.540               | 1.410               | -1.870    | -0.350              | -1.270              |
| 0.0025  | 1.030     | 1.490               | 1.350               | -1.910    | -0.390              | -1.310              |
| 0.0050  | 0.980     | 1.440               | 1.300               | -1.950    | -0.420              | -1.350              |
| 0.0075  | 0.940     | 1.390               | 1.250               | -1.980    | -0.460              | -1.390              |
| 0.0100  | 0.890     | 1.340               | 1.200               | -2.020    | -0.500              | -1.430              |
| 0.0125  | 0.850     | 1.290               | 1.150               | -2.060    | -0.540              | -1.470              |
| 0.0150  | 0.800     | 1.2519              | 1.100               | -2.090    | -0.570              | -1.504              |

Table 2: The calculated LUMO and HOMO values for each of the designs. These were calculated using a PBE functional.
